# Supplementary material for: Enhanced electrochromic properties of a TiO2nanowire array via decoration with anatase nanoparticles
Source: Royal Society of Chemistry journal article supplement (doi:10.1039/c4tc00911h), 2014-07-30
Supplement: c4tc00911h1.pdf [file c4tc00911h1.pdf]

## Electronic Supplementary Information

### Enhanced Electrochromic Properties of TiO<sub>2</sub> Nanowires Array via Decoration with Anatase Nanoparticles

Shuping Liu,<sup>b</sup> Xintong Zhang,<sup>\*a</sup> Panpan Sun,<sup>a</sup> Changhua Wang,<sup>a</sup> Yongan Wei,<sup>a</sup>

Yichun Liu<sup>\*a</sup>

<sup>a</sup>Center for Advanced Optoelectronic Functional Materials Research, and Key Laboratory for UV-Emitting Materials and Technology of Ministry of Education, Northeast Normal University, 5268 Renmin Street, Changchun 130024, China. Fax: 86 431 85099772; Tel.:86 431 85099772; E-mail: xtzhang@nenu.edu.cn

<sup>b</sup>College of Tourism and Cuisine, Harbin University of Commerce, 138 Tongda Road, Harbin 150076, China.

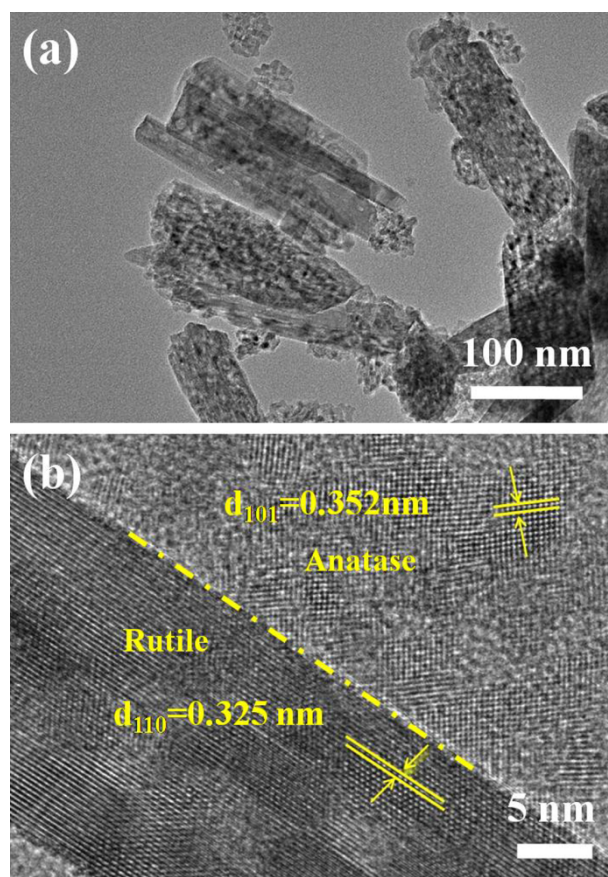

**Fig. SI-1** TEM (a) and HRTEM (b) images of TiO<sub>2</sub> NW-NP composite construction. Yellow dashed line denotes the interface between rutile NWs and anatase NPs.

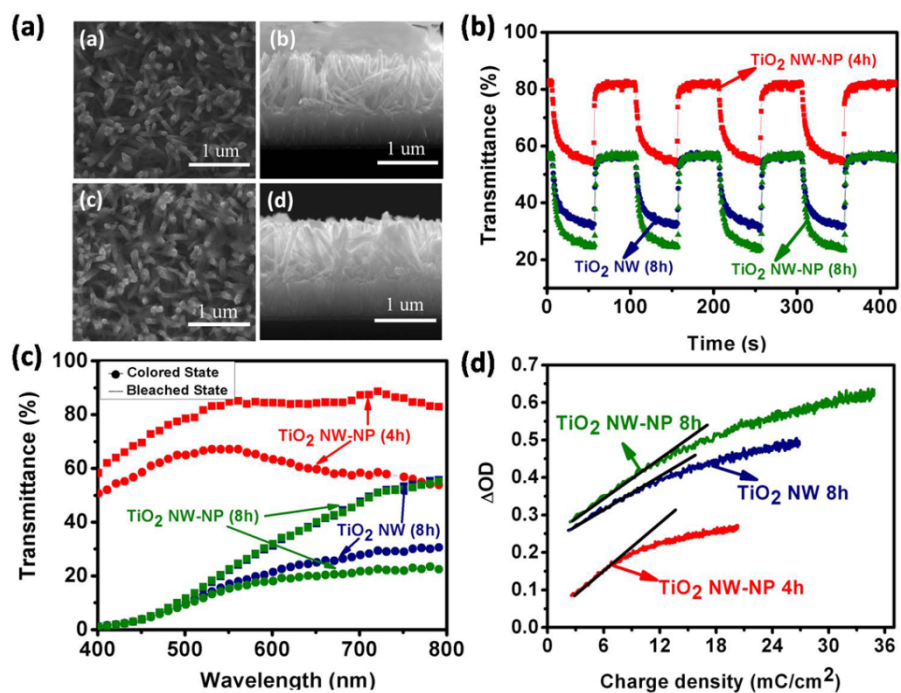

**Fig. SI-2** (a) Top-view and cross-sectional SEM images of (a-b) TiO<sub>2</sub> NW (8 h) and (c-d) TiO<sub>2</sub> NW-NP (8 h) grown on bare FTO substrate. (b-d) Optical transmittance change, visible spectra, and coloration efficiency at 800 nm of TiO<sub>2</sub> NW-NP (4 h), TiO<sub>2</sub> NW (8 h) and TiO<sub>2</sub> NW-NP (8 h) films.

---

\*To whom correspondence should be addressed. Tel./Fax: +86-431-85099772; E-mail: xtzhang@nenu.edu.cn
